# Supplementary material for: Preamble and pilot symbol design for channel estimation in OFDM systems with null subcarriers
Source: Springer Nature journal article supplement (doi:10.1186/1687-1499-2011-2), 2011-06-03

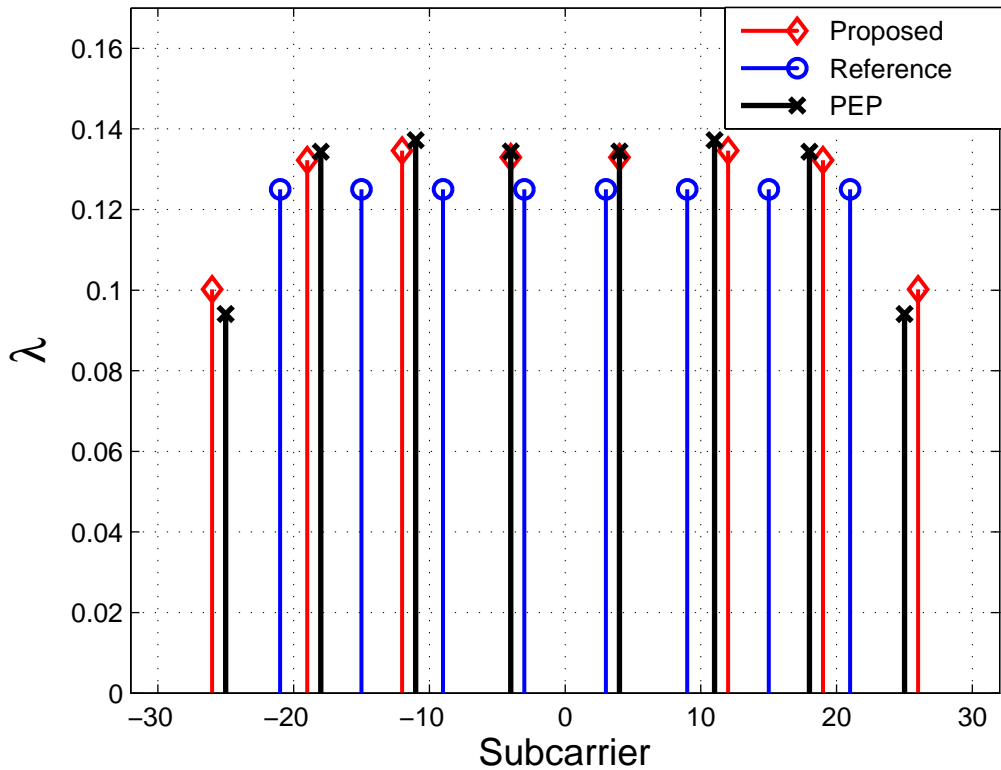

Supplement: 13638_2010_4_MOESM6_ESM.pdf [file 13638_2010_4_MOESM6_ESM.pdf]
